# Supplementary material
Source: MDPI journal article supplement (https://www.mdpi.com/2071-1050/11/17/4582)
Supplement: s1 [file s1]

Archive with 2 entries (2 files):
- S1_Additional_Information_Study_Sites.pdf
- S2_Study_Sites_Maps.jpg
