# Supplementary material
Source: MDPI journal article supplement (https://www.mdpi.com/2071-1050/11/17/4582)

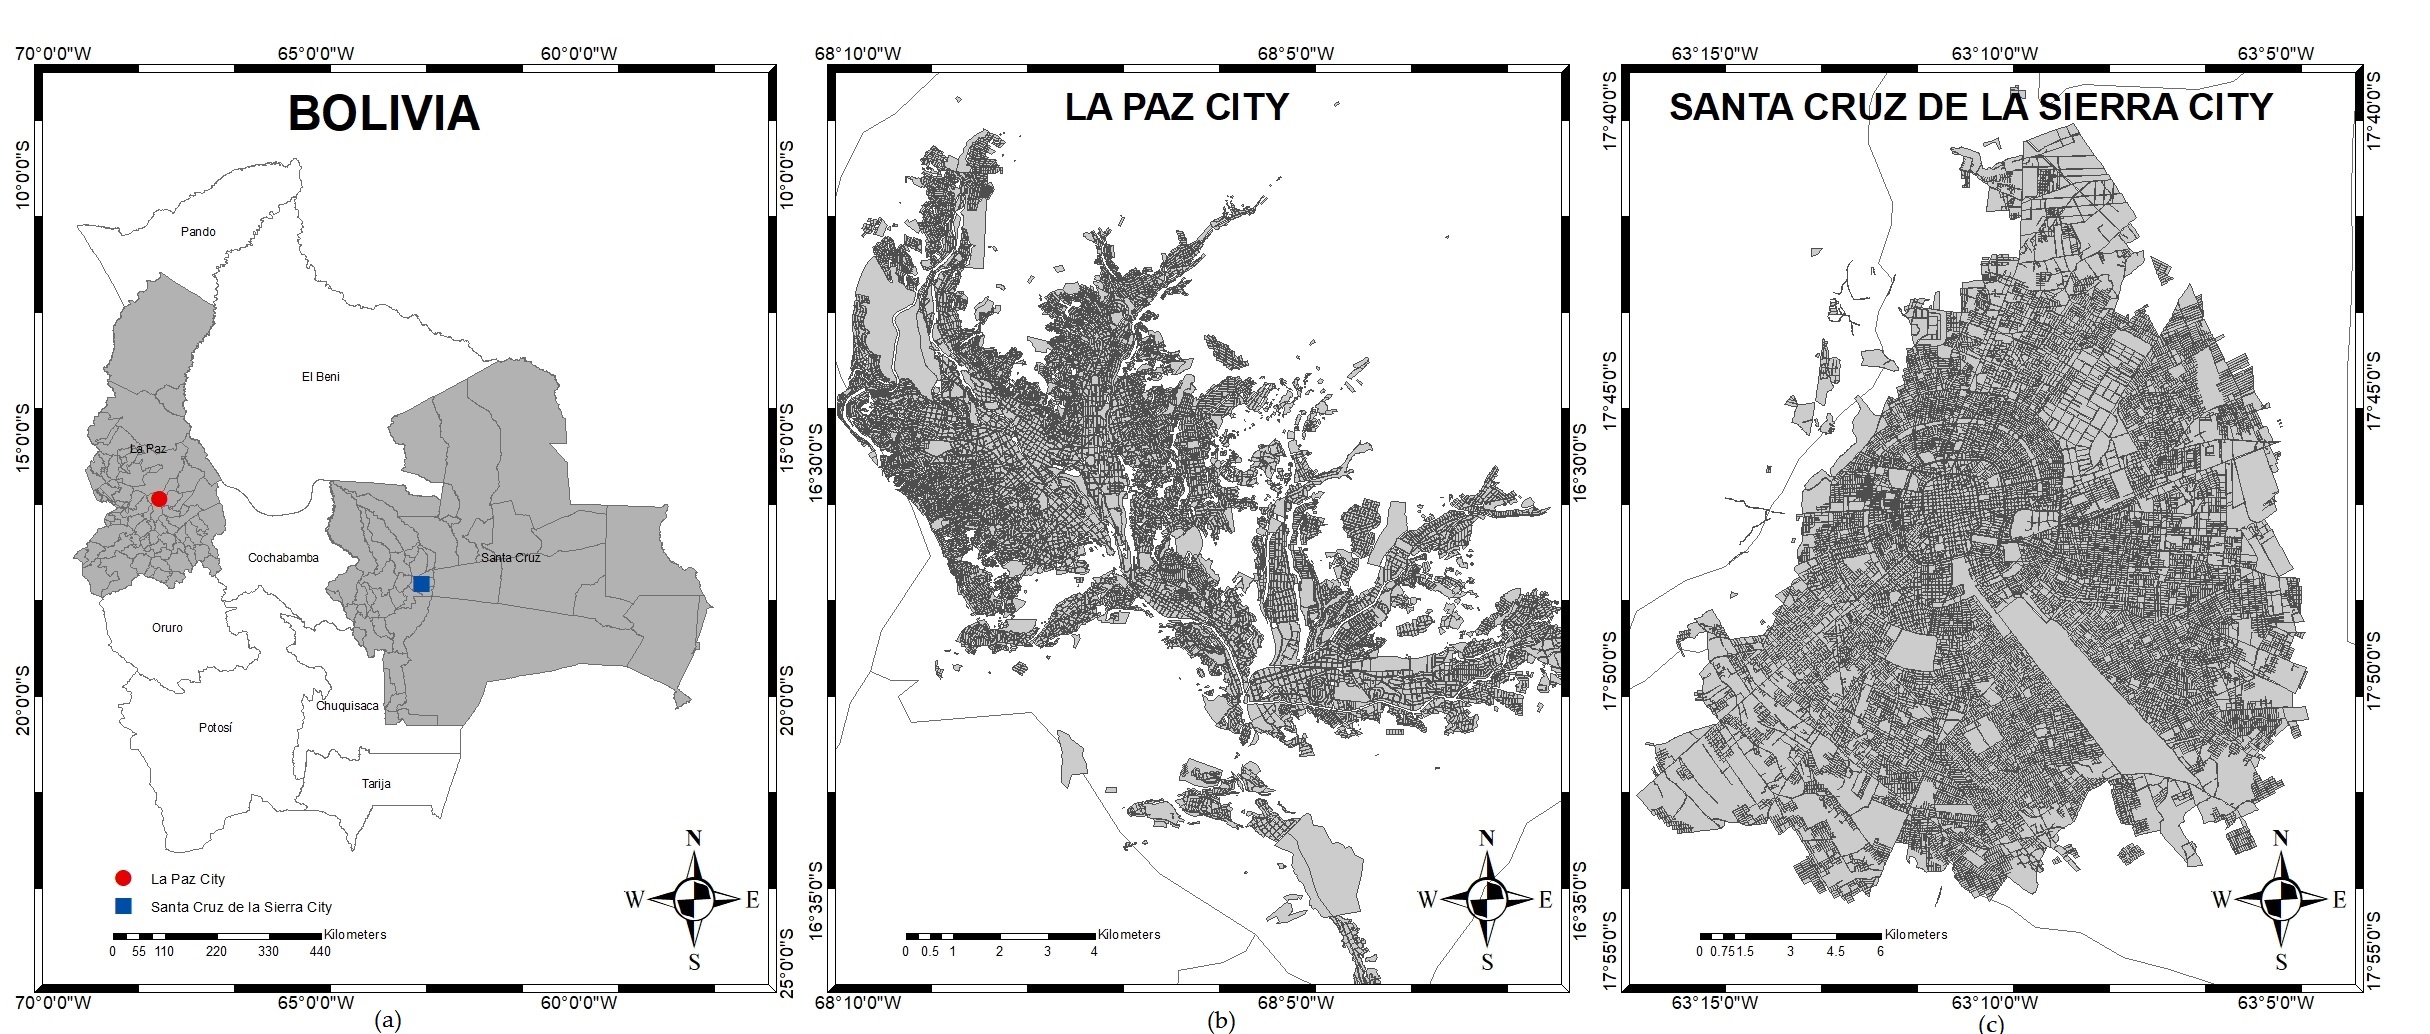

Supplement: s1 [file s1 › S2_Study_Sites_Maps.jpg]
